# Supplementary material for: TEOS-based consolidants for carbonate stones: the role of N1-(3-trimethoxysilylpropyl)diethylenetriamine
Source: Royal Society of Chemistry journal article supplement (doi:10.1039/c6nj03808e), 2017-01-01
Supplement: c6nj03808e1.pdf [file c6nj03808e1.pdf]

## Supporting Information

1

2

3 TEOS-based consolidants for carbonate stones: the

4 role of N1-(3-

5 trimethoxysilylpropyl)diethylenetriamine

6 *B. Sena da Fonseca<sup>a</sup>, S. Piçarra<sup>b,c</sup>, A. P. Ferreira Pinto<sup>d</sup>, Maria João Ferreira<sup>a</sup>, M.F.*

7 *Montemor<sup>a</sup>*

8

9 <sup>a</sup>Centro de Química Estrutural-CQE, Instituto Superior Técnico, Universidade de  
10 Lisboa, 1049-001 Lisboa, Portugal

11 <sup>b</sup>Escola Superior de Tecnologia de Setúbal, Campus do IPS, Estefanilha, 2910-761  
12 Setúbal, Portugal

13 <sup>c</sup>Centro de Química-Física Molecular and Instituto de Nanociência e Nanotecnologia,  
14 Instituto Superior Técnico, Universidade de Lisboa, 1049-001, Lisboa, Portugal

15 <sup>d</sup>Department of Civil Engineering, Architecture and Georesources, CERIS, ICIIST,  
16 Instituto Superior Técnico, Universidade de Lisboa, 1049-001 Lisboa, Portugal

17

18

19 **Corresponding Author**

20 \*E-mail: [senadafonseca@gmail.com](mailto:senadafonseca@gmail.com), Phone: (+351)925455230

21

22

23

24

25 **S.I.1-** Morphology of the xerogel derived from the formulation prepared by replacing  
26 the SiDETA by NH<sub>4</sub>OH with the same molar ratio concerning the NH groups in relation  
27 to TEOS. This xerogel has a much smoother surface than its equivalent containing  
28 SiDETA.

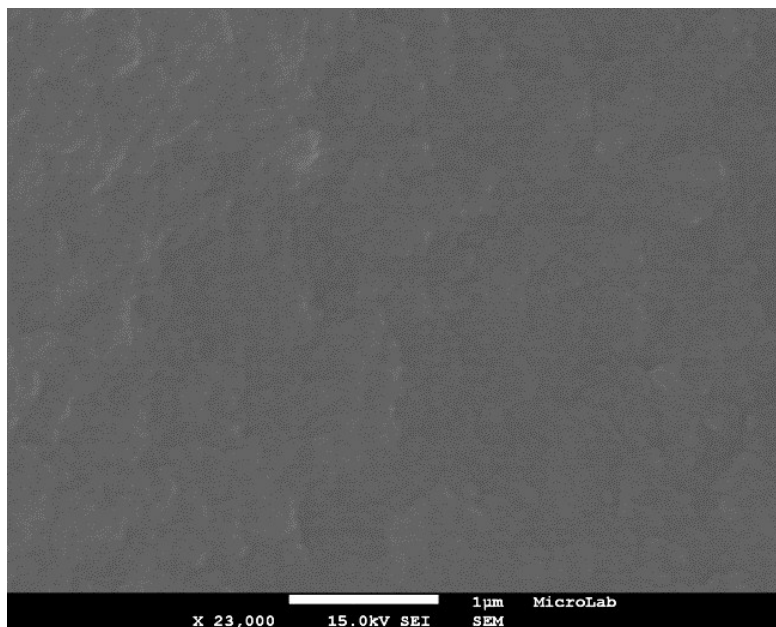

29  
30  
31
